# Supplementary material for: Neoadjuvant nivolumab modifies the tumor immune microenvironment in resectable glioblastoma
Source: Springer Nature journal article supplement (doi:10.1038/s41591-018-0339-5), 2019-02-11
Supplement: 41591_2018_339_MOESM1_ESM.pdf [file 41591_2018_339_MOESM1_ESM.pdf]

In the format provided by the authors and unedited.

# Neoadjuvant nivolumab modifies the tumor immune microenvironment in resectable glioblastoma

**Kurt A. Schalper<sup>1,12</sup>, Maria E. Rodriguez-Ruiz<sup>2,3,4,12</sup>, Ricardo Diez-Valle<sup>5,6,12</sup>, Alvaro López-Janeiro<sup>7</sup>, Angelo Porciuncula<sup>1</sup>, Miguel A. Idoate<sup>7</sup>, Susana Inogés<sup>6</sup>, Carlos de Andrea<sup>7</sup>, Ascensión López-Díaz de Cerio<sup>6</sup>, Sonia Tejada<sup>5</sup>, Pedro Berraondo <sup>8</sup>, Franz Villarroel-Espindola<sup>1</sup>, Jungmin Choi<sup>9</sup>, Alfonso Gúrpide<sup>2</sup>, Miriam Giraldez<sup>10</sup>, Iosune Goicoechea<sup>2</sup>, Jaime Gallego Perez-Larraya <sup>11</sup>, Miguel F. Sanmamed<sup>1,2</sup>, Jose L. Perez-Gracia <sup>2,3,4,13</sup> and Ignacio Melero <sup>3,4,5,6,13\*</sup>**

---

<sup>1</sup>Department of Pathology, Yale School of Medicine, New Haven, CT, USA. <sup>2</sup>Department of Oncology, Clínica Universidad de Navarra, Pamplona, Spain. <sup>3</sup>Centro de Investigación Biomedica en Red de Oncología (CIBERONC), Madrid, Spain. <sup>4</sup>Instituto de Investigación Sanitaria de Navarra (IDISNA), Pamplona, Spain. <sup>5</sup>Department of Neurosurgery, Clínica Universidad de Navarra, Pamplona, Spain. <sup>6</sup>Department of Immunology, Clínica Universidad de Navarra, Pamplona, Spain. <sup>7</sup>Department of Pathology, Clínica Universidad de Navarra, Pamplona, Spain. <sup>8</sup>Centro de Investigación Medica Aplicada (CIMA), Universidad de Navarra, Pamplona, Spain. <sup>9</sup>Department of Genetics, Yale School of Medicine, New Haven, CT, USA. <sup>10</sup>Department of Pharmacy, Clínica Universidad de Navarra, Pamplona, Spain. <sup>11</sup>Department of Neurology, Clínica Universidad de Navarra, Pamplona, Spain. <sup>12</sup>These authors contributed equally: Kurt A. Schalper, Maria E. Rodriguez-Ruiz, Ricardo Diez-Valle. <sup>13</sup>These authors jointly supervised this work: Jose L. Perez-Gracia, Ignacio Melero. \*e-mail: [imelero@unav.es](mailto:imelero@unav.es)

**Supplementary Table 1:** main inclusion and exclusion criteria of the protocol.

| INCLUSION CRITERIA                                                                                                                               | EXCLUSION CRITERIA                                                                                                                                                                                                                                                                                                                                                                                         |
|--------------------------------------------------------------------------------------------------------------------------------------------------|------------------------------------------------------------------------------------------------------------------------------------------------------------------------------------------------------------------------------------------------------------------------------------------------------------------------------------------------------------------------------------------------------------|
| Age $\geq$ 18 years and ECOG of 0-1.                                                                                                             | Prior malignancies except basal cell carcinoma or scaly skin, cervical carcinoma in situ adequately treated or other tumors treated curatively without recurrence for 3 or more years.                                                                                                                                                                                                                     |
| Ability to provide informed consent and express their desire to fulfill all protocol requirements during the study period.                       | Suspected or known autoimmune disease. Subjects with vitiligo, type I diabetes mellitus, residual hypothyroidism due to autoimmune condition only requiring hormone replacement, psoriasis not requiring systemic treatment, or conditions not expected to recur in the absence of an external trigger were permitted to enroll.                                                                           |
| Patients with histologically confirmed glioblastoma, either requiring salvage surgery to treat relapsed disease or undergoing primary resection. | Previous treatment with a PD-1, P-DL1 or targeted therapy.                                                                                                                                                                                                                                                                                                                                                 |
| Patients in whom surgery can be safely delayed for a minimum period of 2 weeks following the administration of the first dose of nivolumab.      | Positive serology for HIV, hepatitis B (HBsAg) or hepatitis C.                                                                                                                                                                                                                                                                                                                                             |
| The patient should, in the investigator's opinion, be able to comply with all clinical trial requirements.                                       | Conditions requiring systemic treatment with either corticosteroids (>10 mg daily prednisone equivalents), with the exception of control of cerebral edema, or other immunosuppressive medications within 14 days of study drug administration. Inhaled or topical steroids and adrenal replacement doses > 10 mg daily prednisone equivalents were permitted in the absence of active autoimmune disease. |
| Negative pregnancy test for women of childbearing age and adequate contraceptive measures.                                                       | Pregnant or lactating women                                                                                                                                                                                                                                                                                                                                                                                |

**Supplementary Table 2:** summary of patient characteristics.

| Patient characteristics                                 | n=29 patients                                                                               |
|---------------------------------------------------------|---------------------------------------------------------------------------------------------|
| Age at diagnosis (years), median (range)                | 54 (33-73)                                                                                  |
| Gender, n (%)                                           | Male = 19 (65.5%)<br>Female = 10 (34.5%)                                                    |
| GBM cohort, n (%)                                       | Primary = 3 (10.4%)<br>Relapsed = 26 (89.6%)                                                |
| Number of previous treatments, n (%)                    | 0 = 3 (10.4%)<br>1 = 12 (41.3%)<br>≥2 = 14 (48.3%)                                          |
| Tumor characteristics                                   |                                                                                             |
| MGMT methylation status n (%)                           | Methylated = 10 (34.5%)<br>Unmethylated = 14 (48.3%)<br>Unknown = 5 (17.2%)                 |
| IDH mutation status n (%)                               | Not Mutated = 26 (89.6%)<br>Mutated = 3 (10.4%)                                             |
| EGFR amplification status n (%)                         | Amplified = 11 (38%)<br>Not Amplified = 12 (41.3%)<br>Unknown = 6 (20.7%)                   |
| Treatment characteristics                               |                                                                                             |
| Neoadjuvant nivolumab, n (%)                            | 29 (100%)                                                                                   |
| Surgery, n (%)                                          | 29 (100%)                                                                                   |
| Extent of tumor resection, n (%)                        | Complete = 14 (48.3%)<br>Nearly Complete = 4 (13.7%)<br>Partial = 11 (38%)                  |
| Number of Nivolumab doses after surgery, median (range) | 7.2 (1-50)                                                                                  |
| Status at end of study, n (%)                           | Alive = 3 (10.4%)<br>Death from tumor = 22 (75.9%)<br>Death from other cause = 4 (13.7%)    |
| Subsequent treatment, n (%)                             | No treatment = 15 (51.7%)<br>BVZ (alone or in combination) = 9 (34.6%)<br>Other = 4 (13.7%) |

\*excluding patients with primary diagnosis

**Supplementary Table 3:** individual patient characteristics.

| Patient number | Cohort    | Gender | Age | Previous treatment | Nivolumab presurgery | Resection       | MGMT promoter | IDH1 mutation | EGFR amplification | Number of nivolumab doses post-surgery | Status | Subsequent treatment | PFS pre nivolumab (days) | PFS (days) | OS (days) |
|----------------|-----------|--------|-----|--------------------|----------------------|-----------------|---------------|---------------|--------------------|----------------------------------------|--------|----------------------|--------------------------|------------|-----------|
| 001            | Recurrent | M      | 41  | Stupp/S+BVZ        | Yes                  | Complete        | Methylated    | No            | No                 | 3                                      | DT     | No                   | 235                      | 65         | 84        |
| 003            | Recurrent | M      | 49  | Stupp              | Yes                  | Partial         | Methylated    | IDH1 R132     | No                 | 19                                     | DT     | BVZ                  | 2310                     | 322        | 353       |
| 004            | Primary   | F      | 65  | N/A                | Yes                  | Complete        | Methylated    | No            | No                 | 50                                     | A      | NA                   | NA                       | +876       | +876      |
| 005            | Recurrent | F      | 38  | Stupp/F            | Yes                  | Partial         | Unmethylated  | No            | Yes                | 3                                      | DT     | BVZ                  | 297                      | 101        | 179       |
| 007            | Recurrent | M      | 42  | Stupp              | Yes                  | Complete        | Unmethylated  | No            | Yes                | 3                                      | DO     | No                   | 257                      | 130        | 130       |
| 008            | Recurrent | M      | 71  | stupp              | Yes                  | Complete        | Methylated    | No            | No                 | 5                                      | DT     | No                   | 167                      | 93         | 282       |
| 009            | Recurrent | M      | 73  | stupp              | Yes                  | Partial         | Methylated    | No            | No                 | 2                                      | DT     | No                   | 403                      | 556        | 556       |
| 010            | Recurrent | M      | 51  | Stupp+DC/Lytix V   | Yes                  | Nearly Complete | Methylated    | No            | Yes                | 4                                      | DT     | RT                   | 319                      | 78         | 119       |
| 011            | Recurrent | F      | 57  | Stupp/S+PVC        | Yes                  | Partial         | Unmethylated  | No            | Yes                | 7                                      | DT     | No                   | 161                      | 119        | 238       |
| 012            | Recurrent | M      | 60  | Stupp/Lytix V      | Yes                  | Partial         | Methylated    | No            | No                 | 2                                      | DT     | No                   | 84                       | 83         | 207       |
| 013            | Recurrent | M      | 65  | S+TMZ              | Yes                  | Partial         | Unmethylated  | No            | Yes                | 2                                      | DT     | No                   | 134                      | 42         | 42        |
| 014            | Primary   | M      | 73  | N/A                | Yes                  | Partial         | Unmethylated  | No            | UK                 | 3                                      | DT     | UK                   | NA                       | 124        | 313       |
| 015            | Recurrent | M      | 32  | Stupp/F+IRIN+BVZ   | Yes                  | Partial         | Unmethylated  | No            | No                 | 3                                      | DO     | No                   | 313                      | 91         | 91        |
| 017            | Recurrent | F      | 41  | Stupp              | Yes                  | Complete        | UK            | No            | UK                 | 1                                      | DT     | TMZ                  | 144                      | 35         | 158       |
| 018            | Recurrent | F      | 64  | Stupp/BVZ          | Yes                  | Complete        | UK            | IDH1 R132     | UK                 | 4                                      | DT     | BVZ + IRIN           | 264                      | 71         | 527       |
| 019            | Recurrent | M      | 67  | Stupp/S+BVZ        | Yes                  | Complete        | Unmethylated  | No            | Yes                | 6                                      | DT     | BVZ                  | 226                      | 105        | 207       |
| 020            | Recurrent | M      | 59  | Stupp/TMZ+BVZ      | Yes                  | Nearly Complete | Unmethylated  | No            | No                 | 11                                     | DO     | No                   | 91                       | 231        | 231       |
| 021            | Recurrent | F      | 57  | Stupp              | Yes                  | Partial         | Unmethylated  | No            | No                 | 8                                      | DT     | No                   | 481                      | 159        | 159       |
| 022            | Primary   | F      | 33  | N/A                | Yes                  | Complete        | Methylated    | IDH1 R132     | No                 | 35                                     | A      | NA                   | N/A                      | +733       | +733      |
| 023            | Recurrent | M      | 59  | Stupp              | Yes                  | Complete        | UK            | No            | Yes                | 8                                      | DT     | No                   | 223                      | 165        | 191       |
| 024            | Recurrent | M      | 59  | Stupp/BVZ          | Yes                  | Nearly          | Unmethylated  | No            | No                 | 3                                      | DT     | No                   | 210                      | 82         | 162       |

|            |           |   |    |                                    |     |                    |              |    |     |   |    |            |     |     |      |  |
|------------|-----------|---|----|------------------------------------|-----|--------------------|--------------|----|-----|---|----|------------|-----|-----|------|--|
|            |           |   |    |                                    |     | Complete           |              |    |     |   |    |            |     |     |      |  |
| <b>025</b> | Recurrent | M | 45 | S/Stupp                            | Yes | Partial            | Methylated   | No | No  | 7 | DT | No         | 456 | 125 | 219  |  |
| <b>026</b> | Recurrent | M | 53 | Stupp/F                            | Yes | *                  | Methylated   | No | Yes | 0 | C  | UK         | 122 | 14  | 14   |  |
| <b>027</b> | Recurrent | M | 54 | Stupp / Lytix V+ F<br>+ IRIN / BVZ | Yes | Nearly<br>Complete | Unmethylated | No | UK  | 4 | DT | BVZ        | 259 | 85  | 228  |  |
| <b>028</b> | Recurrent | F | 54 | Stupp                              | Yes | Complete           | Unmethylated | No | Yes | 5 | DT | No         | 283 | 221 | 221  |  |
| <b>029</b> | Recurrent | M | 43 | Stupp                              | Yes | Complete           | UK           | No | Yes | 6 | A  | BVZ        | 230 | 123 | +769 |  |
| <b>030</b> | Recurrent | M | 41 | Stupp/S+F                          | Yes | Partial            | Unmethylated | No | Yes | 3 | DT | BVZ        | 159 | 77  | 343  |  |
| <b>032</b> | Recurrent | F | 61 | Stupp                              | Yes | Complete           | UK           | NO | UK  | 4 | DT | BVZ + IRIN | 239 | 75  | 236  |  |
| <b>033</b> | Recurrent | F | 66 | Stupp                              | Yes | Complete           | Unmethylated | No | Yes | 4 | DO | No         | 186 | 156 | 156  |  |
| <b>034</b> | Recurrent | M | 66 | Stupp                              | Yes | Complete           | Methylated   | NO | UK  | 3 | DT | BVZ        | 239 | 160 | 182  |  |

M: male. F: female. Stupp: Stupp's regimen (surgery followed by radiation +temozolamide). S: surgery. F: fotemustine, BVZ: bevacizumab. Lytix V: oncolytic adenovirus. PVC: procarbazine, lomustine and vincristine. IRIN: irinotecan. TMZ: temozolamide. UK: unknown. DT: death from tumor. A: alive. DO: death from other cause. TTP: Time to progression. C: censored (lost to follow-up). NE: non-evaluable. NA: not applicable. Nivo: nivolumab. UK: unknown (due to paucity of sample). OS: overall survival. PFS: Progression-free survival.

**Supplementary Table 4:** nivolumab related toxicity.

| Adverse Events (n=30patients)      | Grade 1       | Grade 2       | Grade 3       |
|------------------------------------|---------------|---------------|---------------|
| Liver function tests               | 1 (3%)        | 1 (3%)        | 1 (3%)        |
| Rash                               | 1 (3%)        | -             | -             |
| Anemia                             | -             | 1 (3%)        | -             |
| Autoimmune primary hyperthyroidism | -             | 1 (3%)        | -             |
| Tumor bleeding                     | -             | -             | 2 (6%)        |
| <b>Total number of patients</b>    | <b>2 (6%)</b> | <b>3 (9%)</b> | <b>3 (9%)</b> |

**Supplementary Table 5:** clinical characteristics of patients included in the control group.

| N.code | Gender | Age | Most recent prior treatment | Interval between surgeries (months) | Subsequent treatment | PFS post salvage surgery (months) | OS post salvage surgery (months) | MGMT methylation | IDH mutation | EGFR amplification |
|--------|--------|-----|-----------------------------|-------------------------------------|----------------------|-----------------------------------|----------------------------------|------------------|--------------|--------------------|
| 1      | male   | 44  | Stupp                       | 57                                  | CT - BVZ, RT         | 4                                 | 7                                | Unmethylated     | No           | No                 |
| 2      | male   | 28  | CT + BVZ                    | 10                                  | No                   | 1                                 | 1                                | Unmethylated     | No           | UK                 |
| 3      | male   | 54  | Stupp                       | 11                                  | CT                   | 1                                 | 9                                | Unmethylated     | No           | UK                 |
| 4      | male   | 65  | Stupp                       | 11                                  | UK                   | 3                                 | 3                                | Unmethylated     | No           | No                 |
| 5      | male   | 71  | Stupp                       | 24                                  | RT, BVZ              | 6                                 | 6                                | Methylated       | No           | Yes                |
| 6      | female | 45  | Stupp                       | 19                                  | CT + BVZ             | 3                                 | 3                                | Methylated       | No           | No                 |
| 7      | male   | 68  | Stupp                       | 5                                   | CT+BVZ               | 6                                 | 11                               | Unmethylated     | No           | No                 |
| 8      | female | 70  | Stupp                       | 6                                   | BVZ                  | 23                                | 29                               | Methylated       | No           | UK                 |
| 9      | female | 39  | Oncolytic virus, CT         | 3                                   | BVZ                  | 2                                 | 3                                | Unmethylated     | No           | No                 |
| 10     | female | 62  | Stupp                       | 7                                   | CT                   | 41                                | 41                               | Methylated       | No           | No                 |

Stupp: Stupp's regimen (surgery followed by radiation + temozolamide). RT: radiation therapy. CT: chemotherapy. BVZ: bevacizumab. UK: unknown.

**Supplementary Table 6: Monoclonal antibodies used for flow cytometry**

| <b>Material</b>                 | <b>Vendor</b> | <b>Catalog #</b> |
|---------------------------------|---------------|------------------|
| CD127-AF488                     | Biolegend     | 351314           |
| CD4-PerCP-Cy5.5                 | Biolegend     | 317428           |
| CD16-FITC                       | BD Bioscience | 555406           |
| CD56-PE                         | BD Bioscience | 345612           |
| CD3-PerCP-Cy5.5                 | Biolegend     | 300430           |
| HLADR-PE-Cy7                    | Biolegend     | 307616           |
| CD8-APC                         | BD Bioscience | 555369           |
| CD4-PB                          | Biolegend     | 300521           |
| CD45-V500                       | BD Bioscience | 560777           |
| CD33-FITC                       | Biolegend     | 303304           |
| CD11b-PerCP-Cy5.5               | Biolegend     | 301327           |
| CD45-PE-Cy7                     | Biolegend     | 304016           |
| CD14-BV421                      | Biolegend     | 301830           |
| CD15-BV510                      | Biolegend     | 323027           |
| HLADR-FITC                      | BD            | 347400           |
| CD69-PE                         | Biolegend     | 310906           |
| PD1-PerCP/EF710 (Clone MIH4)    | Ebioscience   | 46-9969-42       |
| PD1-PerCPCy5.5 (Clone EH12.2H7) | Biolegend     | 329913           |
| CD3-PE-Cy7                      | Biolegend     | 317333           |
| CD137-APC                       | Biolegend     | 309810           |
| HLADR-APC                       | Biolegend     | 307610           |
| CD8-BV510                       | Biolegend     | 301048           |
| CD25-APC                        | BD            | 340907           |
| CD3-V450                        | BD            | 580365           |
| CD16-PE                         | Biolegend     | 302008           |
| mIgG1-APC                       | Biolegend     | 400121           |
| mIgG1-PE                        | Biolegend     | 400112           |
| IgG1 PerCP-Cy5.5                | Biolegend     | 400150           |
| IgG1 k-FITC                     | Biolegend     | 400110           |
| IgG1 k PerCPEF710               | EBiosciencec  | 46-4714-82       |
| Zombie                          | Biolegend     | 54423106         |
