# Supplementary material for: Neoadjuvant nivolumab modifies the tumor immune microenvironment in resectable glioblastoma
Source: Springer Nature journal article supplement (doi:10.1038/s41591-018-0339-5), 2019-02-11
Supplement: 41591_2018_339_MOESM2_ESM.pdf [file 41591_2018_339_MOESM2_ESM.pdf]

## Reporting Summary

Nature Research wishes to improve the reproducibility of the work that we publish. This form provides structure for consistency and transparency in reporting. For further information on Nature Research policies, see [Authors & Referees](#) and the [Editorial Policy Checklist](#).

### Statistical parameters

When statistical analyses are reported, confirm that the following items are present in the relevant location (e.g. figure legend, table legend, main text, or Methods section).

n/a Confirmed

- The exact sample size ( $n$ ) for each experimental group/condition, given as a discrete number and unit of measurement
- An indication of whether measurements were taken from distinct samples or whether the same sample was measured repeatedly
- The statistical test(s) used AND whether they are one- or two-sided  
*Only common tests should be described solely by name; describe more complex techniques in the Methods section.*
- A description of all covariates tested
- A description of any assumptions or corrections, such as tests of normality and adjustment for multiple comparisons
- A full description of the statistics including central tendency (e.g. means) or other basic estimates (e.g. regression coefficient) AND variation (e.g. standard deviation) or associated estimates of uncertainty (e.g. confidence intervals)
- For null hypothesis testing, the test statistic (e.g.  $F$ ,  $t$ ,  $r$ ) with confidence intervals, effect sizes, degrees of freedom and  $P$  value noted  
*Give  $P$  values as exact values whenever suitable.*
- For Bayesian analysis, information on the choice of priors and Markov chain Monte Carlo settings
- For hierarchical and complex designs, identification of the appropriate level for tests and full reporting of outcomes
- Estimates of effect sizes (e.g. Cohen's  $d$ , Pearson's  $r$ ), indicating how they were calculated
- Clearly defined error bars  
*State explicitly what error bars represent (e.g. SD, SE, CI)*

Our web collection on [statistics for biologists](#) may be useful.

### Software and code

Policy information about [availability of computer code](#)

Data collection

not applicable

Data analysis

not applicable

For manuscripts utilizing custom algorithms or software that are central to the research but not yet described in published literature, software must be made available to editors/reviewers upon request. We strongly encourage code deposition in a community repository (e.g. GitHub). See the Nature Research [guidelines for submitting code & software](#) for further information.

### Data

Policy information about [availability of data](#)

All manuscripts must include a [data availability statement](#). This statement should provide the following information, where applicable:

- Accession codes, unique identifiers, or web links for publicly available datasets
- A list of figures that have associated raw data
- A description of any restrictions on data availability

No restrictions for data availability. Raw data will be available upon request.

## Field-specific reporting

Please select the best fit for your research. If you are not sure, read the appropriate sections before making your selection.

Life sciences  Behavioural & social sciences  Ecological, evolutionary & environmental sciences

For a reference copy of the document with all sections, see [nature.com/authors/policies/ReportingSummary-flat.pdf](https://www.nature.com/authors/policies/ReportingSummary-flat.pdf)

## Life sciences study design

All studies must disclose on these points even when the disclosure is negative.

|                 |                                                                                                   |
|-----------------|---------------------------------------------------------------------------------------------------|
| Sample size     | Usual number in an exploratory phase IIa trial given the neoadjuvant nature of the clinical trial |
| Data exclusions | Specified                                                                                         |
| Replication     | Specified                                                                                         |
| Randomization   | not applicable                                                                                    |
| Blinding        | not applicable                                                                                    |

## Reporting for specific materials, systems and methods

### Materials & experimental systems

|                                     |                                                                 |
|-------------------------------------|-----------------------------------------------------------------|
| n/a                                 | Included in the study                                           |
| <input checked="" type="checkbox"/> | <input type="checkbox"/> Unique biological materials            |
| <input type="checkbox"/>            | <input checked="" type="checkbox"/> Antibodies                  |
| <input checked="" type="checkbox"/> | <input type="checkbox"/> Eukaryotic cell lines                  |
| <input checked="" type="checkbox"/> | <input type="checkbox"/> Palaeontology                          |
| <input checked="" type="checkbox"/> | <input type="checkbox"/> Animals and other organisms            |
| <input type="checkbox"/>            | <input checked="" type="checkbox"/> Human research participants |

### Methods

|                                     |                                                    |
|-------------------------------------|----------------------------------------------------|
| n/a                                 | Included in the study                              |
| <input checked="" type="checkbox"/> | <input type="checkbox"/> ChIP-seq                  |
| <input type="checkbox"/>            | <input checked="" type="checkbox"/> Flow cytometry |
| <input checked="" type="checkbox"/> | <input type="checkbox"/> MRI-based neuroimaging    |

## Antibodies

|                 |                                                                                                                                                                                                                                                                                                                                  |
|-----------------|----------------------------------------------------------------------------------------------------------------------------------------------------------------------------------------------------------------------------------------------------------------------------------------------------------------------------------|
| Antibodies used | Are included in a supplementary table (Table S6)                                                                                                                                                                                                                                                                                 |
| Validation      | Validation for antibodies used for FC was provided by the manufacturer.<br>Antibodies for QIF were previously validated and published in J Natl Cancer Inst 2015, 107(3). pii: dju435. and Lab Invest 2015, 95(4):385-96. For the antibody validation protocol check Biotechniques. 2010, 48(3):197-209. doi: 10.2144/000113382. |

## Human research participants

Policy information about [studies involving human research participants](#)

|                            |                                                                                                        |
|----------------------------|--------------------------------------------------------------------------------------------------------|
| Population characteristics | Glioblastoma patients planned to undergo neurosurgery.                                                 |
| Recruitment                | Patients were offered participation in the trial in the neurooncology clinics of University of Navarra |

## Plots

Confirm that:

- The axis labels state the marker and fluorochrome used (e.g. CD4-FITC).
- The axis scales are clearly visible. Include numbers along axes only for bottom left plot of group (a 'group' is an analysis of identical markers).
- All plots are contour plots with outliers or pseudocolor plots.
- A numerical value for number of cells or percentage (with statistics) is provided.

## Methodology

|                           |                                                                                                                                           |
|---------------------------|-------------------------------------------------------------------------------------------------------------------------------------------|
| Sample preparation        | Described in material ad methods from cell suspensions from surgical tumor specimens. GentleMACS dissociator (Milteny, Biotech) was used. |
| Instrument                | FACS Canto                                                                                                                                |
| Software                  | DIVA (BD, Bioscience) as software for the sample adquisition and FlowJo software (FlowJo LLC) for the analysis.                           |
| Cell population abundance | As shown in the figures                                                                                                                   |
| Gating strategy           | FSC/ssC for leljukocyte CD45 populations. Then gated for CD3, CD8 positive events.                                                        |

- Tick this box to confirm that a figure exemplifying the gating strategy is provided in the Supplementary Information.
